# Supplementary material for: Choline Supplementation Normalizes Fetal Adiposity and Reduces Lipogenic Gene Expression in a Mouse Model of Maternal Obesity
Source: PubMed Central journal article supplement (PMC5579692; doi:10.3390/nu9080899), 2017-08-18
Supplement: nutrients-09-00899-s001.pdf [file nutrients-09-00899-s001.pdf]

## Supplementary Information

**Table S1.** Primers used for real-time PCR<sup>1</sup>

|                           | Forward primer                | Reverse primer               |
|---------------------------|-------------------------------|------------------------------|
| <i>Acc1</i>               | 5' GGAGCAGAGAACCTTCGGGG 3'    | 5' CGGACAAGGTAAGCCCCAAT 3'   |
| <i>Acc2</i>               | 5' AGGCAGTCCGCAGGGTGATG 3'    | 5' CCGCCTTACGCTGCAGGGTG 3'   |
| <i>Actb</i>               | 5' TAAGGCCAACCGTGAAAAGA 3'    | 5' TGCCTGTGGTACGACCAGAG 3'   |
| <i>Acox1</i>              | 5' AGGAGGGGATTTT-CTTGAGG 3'   | 5' AGTCAAAGGCATCCACCAA 3'    |
| <i>Bhmt1</i> <sup>2</sup> | 5' ATTCAAGTCTGCACAGTAGCCA 3'  | 5' ACACAAACACTGACTTTCAGCC 3' |
| <i>Chdh</i>               | 5' CAGTGTGGGCAAGGATGAGTAC 3'  | 5' GCAGCAGCACCCGATGATTC 3'   |
| <i>Chrebp1</i>            | 5' AAGTCCACCCACCTTGGCCT 3'    | 5' AGGCTCCAGTGCTTGCTCAG 3'   |
| <i>Dgat1</i>              | 5' GCTTCAAGTGGGGCTGATCC 3'    | 5' GGGGACCGCCAGCTTTAAGA 3'   |
| <i>Elovl5</i>             | 5' GGGTGGCTGTTCTCCAGATTG 3'   | 5' GTGGCCCTTCAGGTGGTCTTTC 3' |
| <i>Fads1</i>              | 5' GCCTTCAACAACCTGGTTCAGTG 3' | 5' CGTACTTGCGCACAGGGATTG 3'  |
| <i>Fasn</i>               | 5' GGAGTGAAAGTGTCAGATCTGC 3'  | 5' CAGTCCACAGAAGTCAGTAGG 3'  |
| <i>Fatp1</i>              | 5' GGCCACCATTCTACAGCAT 3'     | 5' CCACCGTCAACCCGTAGATG 3'   |
| <i>Mttp</i>               | 5' GCCACCACTGTTCTCCAGAGAT 3'  | 5' TTGTGCGCACCGTCTTCTCATG 3' |
| <i>Pcyt1a</i>             | 5' AGCGAGGATGAAGAGGACTAAC 3'  | 5' TGTCTTAGGTTTAGTGTTGGG 3'  |
| <i>Pemt</i>               | 5' TTGGGGATTCGTGTTTGTGC 3'    | 5' ACGCTGAAGGGAAATGTGGTC 3'  |
| <i>Scd1</i>               | 5' CGCCCCTACGACAAGAACATTC 3'  | 5' TGGCAGAGTAGTCGAAGGGG 3'   |
| <i>Srebp1c</i>            | 5' CATGGACGAGCTGGCCTTC 3'     | 5' ACTGTCTTGGTTGTTGATGAGC 3' |

<sup>1</sup> *Actb*: beta-actin; *Acc*: acetyl-CoA carboxylase; *Acox1*: peroxisomal acyl-coenzyme A oxidase 1; *Bhmt*: betaine—homocysteine S-methyltransferase; *Chdh*: choline dehydrogenase; *Chrebp1*: Carbohydrate-responsive element-binding protein; *Dgat1*: diacylglycerol O-acyltransferase 1; *Elovl5*: fatty acid elongase 5; *Fasn*: fatty acid synthase; *Fatp1*: fatty acid transport protein 1; *Mttp*: microsomal triglyceride transfer protein; *Pcyt1a*: choline-phosphate cytidylyltransferase A; *Pemt*: phosphatidylethanolamine N-methyltransferase; *Ppara*: Peroxisome proliferator-activated receptor alpha; *Scd1*: stearoyl-CoA desaturase-1; *Srebp1c*: Sterol regulatory element-binding protein 1c

<sup>2</sup> *Bhmt1*, *Chdh*, *Pcyt1a*, and *Pemt* primers were previously published [37].
